# Supplementary material
Source: Springer Nature journal article supplement (https://www.springermedizin.de/resource/supplementary/12990_2008_223_MOESM5_ESM.pdf/9612824)

**A**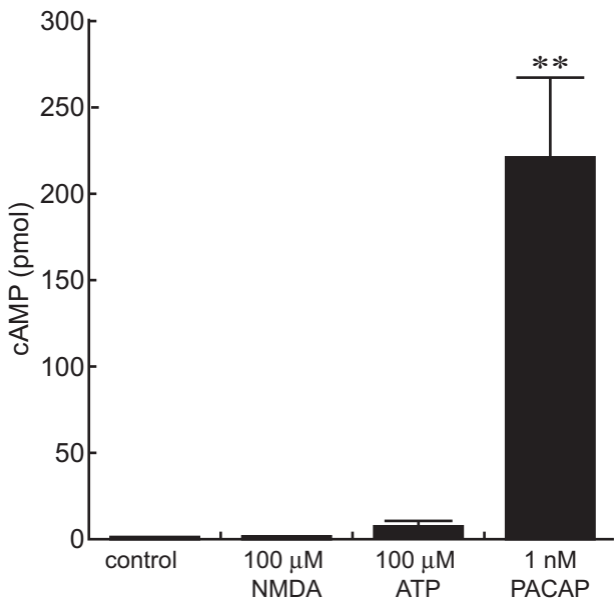**B**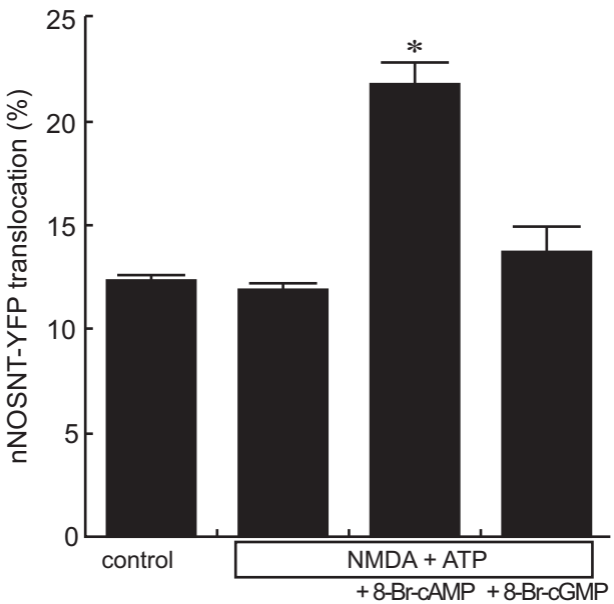

Supplement: MOESM5 [file 9612824]
